# Supplementary material
Source: Research Square preprint supplement (doi:10.21203/rs.3.rs-9132478/v1)
Supplement: Supplementary file 1 [file 7881ca86fa67f1c4f5b49252.docx]

INTERVIEW GUIDE: INTERNALLY DISPLACED PERSONS (IDPs)

Date: _____ /_____/2022

Interview No: ………………

1. **Socio-Demographic Context (Brief Narrative)**

- Personal Profile: To start, could you tell me a bit about yourself? How old are you, and how would you describe your role within your family?
- Displacement Timeline: When did you and your family arrive in Dori, and where was your original home before the displacement?
- Livelihood: What was your primary occupation before displacement, and how do you support your family now?
- Educational Background: Could you share a bit about your schooling or any training you received back home? How has that influenced how you navigate things here in Dori?
- Household Dynamics: How many people are currently living under your roof, and how do you usually work together to provide for everyone’s needs (food, health, etc.)?
- Economic Status: In a typical month, what are your primary sources of support or income, and how would you describe your current financial stability compared to before you moved?

1. **General Experience of Healthcare Access**

- Comparison of Care: How has your ability to see a doctor or get medicine changed since you were displaced to Dori?
- General Journey: Think of the last time someone in your household was ill. Walk me through the steps you took to get help.

1. **Approachability & Ability to Perceive (Levesque Dimension 1)**

- Information Channels: How do you find out where to go for different health needs (e.g., emergencies vs. routine care) in this new environment?
- Understanding the System: How clear or confusing do you find the way health services are organized here compared to your home community?

1. **Acceptability & Ability to Seek (Levesque Dimension 2)**

- Social & Cultural Fit: How well do the health services here respect your cultural values or religious beliefs?
- Relational Experience: Describe the welcome or treatment you receive from staff. Do you feel you are treated differently as a displaced person?
- Trust: In your community, what is the general opinion about the quality and reliability of the local health centers?

1. **Availability, Accommodation & Ability to Reach (Levesque Dimension 3)**

- Functional Barriers: You mentioned the health centers are [nearby/far]. What specific challenges do you face when physically trying to get there (e.g., safety, transport, road conditions)?
- Time & Waiting: Describe your experience with waiting times. How does the time spent at the clinic affect your daily survival activities or safety?

1. **Affordability & Ability to Pay (Levesque Dimension 4)**

- Financial Burden: When a family member is sick, how do you manage the costs (consultations, tests, medicines)?
- Support Systems: What roles do NGOs, government subsidies, or your own social network (family/friends) play in helping you cover these costs?
- Trade-offs: Have you ever had to choose between buying food and paying for healthcare? Please describe that situation.

1. **Appropriateness & Ability to Engage (Levesque Dimension 5)**

- Meeting Needs: To what extent do the services provided solve the health problems you bring to the clinic? What is missing?
- Patient Involvement: How much do the doctors or nurses involve you in decisions about your treatment? Do you feel listened to?

1. **Conclusion & Recommendations**

- Reflections: If you could change one thing about the health system in Dori to better serve displaced families, what would it be?
- Final Thoughts: Is there anything else about your experience navigating healthcare that we haven't discussed?

Thank you for your time and for sharing your story.

INTERVIEW GUIDE: HEALTHCARE STAKEHOLDERS & SERVICE PROVIDERS

Date: _____ /_____/2022

Interview No: ………………

1. **Professional Profile & Context**

- Professional Identity: Could you briefly describe your professional background? What is your current title and which organization do you represent?
- Area of Expertise: In your daily work, do you focus more on clinical care, high-level management, or humanitarian coordination for displaced populations?
- Experience in Conflict Settings: How many years of experience do you have in the health sector, and specifically, how long have you been working in the Dori district or similar conflict-affected areas?
- Training and Education: What is your highest level of professional qualification (e.g., Medical Degree, master’s in public health, etc.), and have you received specific training for working in humanitarian crises?
- Scope of Action: Which specific zones within the Dori district do you or your organization primarily cover? This helps me understand the geographic context of your observations.

1. **Availability & Service Supply (Approachability & Accommodation)**

- Coverage and Presence: From your professional perspective, how adequate is the physical presence of health service points in the primary IDP host areas?
- Continuity of Care: How has the conflict impacted the permanence and continuity of services? (e.g., staff rotations, facility closures, or supply chain interruptions).
- Organizational Barriers: What are the main challenges IDPs face regarding how services are structured (waiting times, triage, or administrative requirements)?

1. **Accessibility & Geographic Reach**

- Information Gaps: In your experience, how well-informed are IDPs about the specific services available to them? Where are the gaps in communication?
- Physical Navigation: Beyond distance, what specific environmental or security-related obstacles hinder IDPs from physically reaching the health centers?
- Communication Barriers: To what extent do linguistic differences or literacy levels impact the quality of interaction between providers and displaced patients?

1. **Acceptability & Relational Quality**

- Provider-Patient Dynamics: How would you characterize the general attitude and behavior of healthcare staff toward IDPs? Are there specific tensions you have observed?
- Cultural Sensitivity: How effectively does the current health system integrate the religious and cultural beliefs of displaced communities into clinical practice?
- Community Perception: Based on your interactions, what is the prevailing "reputation" of the formal health system among the IDP communities?

1. **Affordability & Financial Resilience**

- Economic Barriers: How do current service costs (consultations, diagnostics, and drugs) align with the actual purchasing power of the IDP households you serve?
- Institutional & Social Support: How effective are the current NGO or government subsidy mechanisms in covering the health expenses of the most vulnerable?
- Unmet Financial Needs: Where do you see the greatest "financial leakage" where IDPs are still forced to pay out-of-pocket despite existing aid?

1. **Appropriateness & Quality of Care**

- Service-Need Alignment: To what degree do the services currently offered match the specific epidemiological profile of the IDP population (e.g., trauma, malnutrition, chronic conditions)?
- Patient Engagement: How are IDPs involved in their own care process? Do you feel their voices and feedback are genuinely integrated into treatment plans?
- Quality Metrics: Beyond the numbers, how would you rate the "human quality" and clinical effectiveness of the care provided in this fragile context?

1. **Conclusion & Expert Recommendations**

- Strategic Priorities: If you had the power to change one policy to improve healthcare access for IDPs in Dori, what would it be?
- Open Floor: Are there any other critical issues or emerging trends regarding the health of displaced persons that we haven't covered?

Thank you for your expert contribution to this research.
